# Supplementary material
Source: HighWire-hosted journal article supplement (doi:10.1101/rna.061457.117)
Supplement: Supplemental_Material.docx [file Supplemental_Material.docx]

**Supplemental Material for:**

**Defining molecular interactions between *Arabidopsis* protein-only Ribonuclease Ps and pre-tRNA**

*Bradley P. Klemm,1 Agnes Karasik,2 Kipchumba J. Kaitany,1 Aranganathan Shanmuganathan,2 Matthew J. Henley,4 Adam Z. Thelen, 1 Allison J.L. Dewar,3 Nathaniel D. Jackson,2 Markos Koutmos,2,* Carol A. Fierke1,3,**

1Department of Biological Chemistry, University of Michigan, Ann Arbor, MI, 48109, USA

2Department of Biochemistry and Molecular Biology, Uniformed Services University of the Health Sciences, Bethesda, MD, 20814, USA

3Department of Chemistry, University of Michigan, Ann Arbor, MI, 48109, USA

4Program in Chemical Biology, University of Michigan, Ann Arbor, MI, 48109, USA

*Corresponding Authors. E-mail: markos.koutmos@usuhs.edu; fierke@umich.edu.

**Supplemental Methods**

**Reagents.** Reagents used in this manuscript include 3-morpholinopropane-1-sulfonic acid (MOPS; Acros Organics), tris(2-carboxyethyl)phosphine (TCEP; Gold Biotechnology, Inc.), 1,4-dithio-D-threitol (DTT; Gold Biotechnology, Inc.) 5-iodoacetamidofluorescein (5-IAF; Life Technologies), ethylenediaminetetraacetic acid (EDTA; Acros Organics), tris(hydroxymethyl)aminomethane (Tris; Fisher Scientific), magnesium chloride (MgCl2; Fisher Scientific), calcium chloride (CaCl2; Sigma-Aldrich), sodium chloride (NaCl; Sigma-Aldrich), sodium acetate (NaAc; Fisher Scientific), sodium bromide (NaBr; Sigma-Aldrich), sodium iodide (NaI; Sigma-Aldrich), sodium nitrate (NaNO3; Sigma-Aldrich), sodium sulfate (Na2SO4; Fisher Scientific), 5’-O-monophosphorothioate guanosine (GMPS, synthesized), nucleoside triphosphates (NTPs; Sigma-Aldrich), kanamycin (Acros Organics), chloramphenicol (Acros Organics), urea (MP Biochemicals), bromophenol blue (BPB; Fisher Scientific), xylene cyanol (XC; United States Biochemical Corporation), SYPRO® Orange Protein Gel Stain (Invitrogen), bulk yeast tRNA (Fisher Scientific), and the SequaGel UreaGel system (National Diagnostics).

**Protein-nucleic acid interactions.** Equation S1 was adapted from Equation 18 of deHaseth, *et al*. 1977 and describes the effects of solution ions on the binding affinity between proteins and nucleic acids (deHaseth *et al.* 1977). Variables potentially affecting the measured affinity include pH (*K*H[*H*+]), anion concentration (*K*X[*X*-]), monovalent cation concentration ([*M*+]), and divalent cation concentration ([*S*]/[*S*0]). Parameters include a “standard affinity” under 1 M *M*+ (*K*0), the number of proton donating groups on the protein directly interacting with substrate phosphates (*r*), the number of specifically-occupied anion binding sites on the protein (*a*), the number of phosphates on the substrate directly interacting with the protein (*Z*), the fraction of phosphates in the nucleic acid that thermodynamically associate with a monovalent ion (𝜑), and the competition of *M*+ with *M*2+ for occupancy on backbone phosphates given by the total concentration of nucleotides [*S*] and the concentration of nucleotides that are bound as they would with no M2+ in solution [*S*0]. The term [*S*]/[*S*0] is described by Equation S2.

(S1)

(S2)

**Anion variation.** Binding affinity was measured in various sodium salts at 330 mM Na+ (Table S1). Binding affinity was also measured with varying CaCl2 (alone) and Na2SO4. The pre-tRNAAsp anisotropy in the absence of PRORP and Na+ displays a hyperbolic dependence on CaCl2 (*K*D,app = 11 ± 3 mM, Figure 3A). This behavior is likely due to stabilization of the tRNA structure upon addition of divalent cations (Leroy *et al.* 1977), as the 5'-fluorescein likely has less rotational freedom when the tRNA structure is compact (Liu *et al.* 2014). The anisotropy of free pre-tRNA increased less than 20% above 50 mM Ca2+, so CaCl2 was varied from 50 to 125 mM.

**Thermofluor assays.** Melting curves for each variant at 5 μM enzyme were measured in 30 mM MOPS, pH 7.8, 150 mM NaCl, and 1 mM TCEP, with 20X SYPRO® Orange. Fluorescence intensity (*I*) was monitored using λEx = 485 nm and λEm = 625 nm. The melting temperature (*Tm*) was determined by fitting equation S3 was fit to the data to the maximum intensity, as previously described (Ericsson *et al.* 2006), for which *A* is the initial intensity, *B* is the maximum intensity, *T* is the temperature in Celsius, and *C* is a slope factor.

(S3)

**Circular dichroism assays.** Far UV-CD spectra are presented as the average of 5 accumulations for 10 μM enzyme measured at 25°C in 10 mM phosphate buffer, pH 7.2. The CD measurements were carried out on a Jasco J-815 spectropolarimeter equipped with a circulating water bath and peltier temperature controller. Spectra were converted to mean molar residue ellipticity (*θ*) using equation S4 as previously described (Jayasimha *et al.* 2012), for which *Mr* is the mean molar mass per residue, *l* is the path-length, and *c* is the protein concentration. Overall, the characteristic features of the far UV-CD of WT *At*PRORP2 were retained in Y74S, suggesting that there are no major conformational changes when compared to WT.

(S4)

**Supplemental Tables**

| **Table S1.** Effects of anion identity on affinity for pre-tRNAAsp. | | |
| --- | --- | --- |
| **Na+ Salt*a*** | ***K*D (nM)*b*** | **Lyotropic series** |
| Ac- | 32 ± 7 | More kosmotropic  More chaotropic |
| SO42- | 70 ± 10 |
| Cl- | 155 ± 20 |
| Br- | 450 ± 160 |
| NO3- | 490 ± 60 |
| I- | 2900 ± 500 |
| ***a***: Supplied as the sodium salt at 330 mM Na+.  ***b***: Value and error reported are from fitting a hyperbola to the results of two independent experiments plotted together. | | |

| **Table S2.** Effects of mutation to *At*PRORP2 PPRs on affinity for pre-tRNA. | | | | | | | |
| --- | --- | --- | --- | --- | --- | --- | --- |
| ***At*PRORP1 Residue** | ***At*PRORP2 Residue** | **Position (PPR / Residue)** | **pre-tRNAGly** | |  | **pre-tRNAAsp** | **Highest Fold-WT** |
| ***K*D (nM)*a,b*** | ***K*D (nM)*a,c*** |  | ***K*D (nM)*a,b*** |
| **–** | WT | **–** | 58 ± 8 | 260 ± 30 |  | 24 ± 5 | 1.0 |
| A98 | T31A | 1 / 3 | 60 ± 8 | 530 ± 50 |  |  | 2.0 |
| K101 | L34A | 1 / 6 | 28 ± 6 | 170 ± 10 |  |  | 0.7 |
| D105 | N38A | 1 / 10 | 160 ± 40 | 1410 ± 150 |  | 70 ± 20 | 5.4 |
| S131 | S65A | 2 / 1 | 100 ± 20 | 590 ± 80 |  | 35 ± 8 | 2.3 |
| Y133 | Q67A | 2 / 3 | 70 ± 10 | 390 ± 70 |  | 30 ± 5 | 1.5 |
| Y140 | Y74S | 2 / 10 | 1340 ± 170 |  |  | 110 ± 30 | 23 |
| Y74F | 170 ± 20 |  |  | 45 ± 9 | 2.9 |
| N175 | N108A | 3 / 1 | 190 ± 30 | 720 ± 50 |  | 70 ± 20 | 3.3 |
| T180 | T113A | 3 / 6 | 70 ± 20 | 900 ± 130 |  | 30 ± 3 | 3.5 |
| R210 | R145A***d*** | 4 / 1 | > 2000 |  |  |  | > 34 |
| F119 | L154A | 4 / 10 | 60 ± 10 | 230 ± 20 |  |  | 1.0 |
| E245 | E180A | 5 / 1 | 35 ± 4 | 150 ± 20 |  |  | 0.6 |
| A250 | S185A | 5 / 6 | 40 ± 6 | 350 ± 40 |  |  | 1.3 |
| K254 | K189A | 5 / 10 | 52 ± 9 | 350 ± 30 |  |  | 1.3 |
| S280 | S215A | α11 / 1 | 66 ± 21 | 360 ± 60 |  |  | 1.4 |
| S282 | E217A | α11 / 3 | 56 ± 14 | 260 ± 20 |  |  | 1.0 |
| D285 | K220A | α11 / 6 | 129 ± 64 | 250 ± 40 |  |  | 2.2 |
| E289 | E224A | α11 / 10 | 55 ± 7 | 310 ± 35 |  |  | 1.2 |
| ***a***: Value and error reported are from fitting a hyperbola to the results of three independent experiments plotted together.  ***b***: Measured in 30 mM MOPS pH 7.8, 1 mM DTT, 150 mM NaCl, and 6 mM CaCl2.  ***c***: Measured in 30 mM MOPS pH 7.8, 1 mM DTT, 330 mM NaCl, and 6 mM CaCl2.  ***d***: Low protein yield for R145A limited us to two binding assays, neither of which reached saturation up to 7500 nM. A lower limit for the *K*D was estimated from the available data. | | | | | | | |

| **Table S3.** Effects of *B*. *subtilis* pre-tRNAAsp mutants on affinity for *At*PRORP1. | | |
| --- | --- | --- |
| **Variant** | ***K*D (nM)*a*** | **Fold-WT** |
| WT | 155 ± 20 | 1.00 |
| U16A | 140 ± 20 | 0.90 |
| U17A | 100 ± 10 | 0.65 |
| U20A | 200 ± 10 | 1.29 |
| U21A | 300 ± 30 | 1.94 |
| ***a***: Value and error reported are from fitting a hyperbola to the results of two independent experiments in 330 mM NaCl plotted together. | | |

| **Table S4.** Effects of mutations on *At*PRORP1 affinity for pre-tRNA. | | | | | | | |
| --- | --- | --- | --- | --- | --- | --- | --- |
| **Variant** | **pre-tRNACys** | | | |  | **pre-tRNAAsp** | |
| ***K*D (nM)*a*** | **Fold-WT** | ***K*D (nM)*b*** | **Fold-WT** | ***K*D (nM)*a*** | **Fold-WT** |
| WT | 200 ± 40 | 1 | 1720 ± 160 | 1 |  | 155 ± 20 | 1 |
| Y140A***c*** | 150 ± 20 | 0.75 | >160000 | >93 |  | 29700 ± 7000 | 192 |
| R184A | 170 ± 40 | 0.85 | >6500 | >3.8 |  | 10400 ± 2400 | 67 |
| ***a***: Value and error reported are from fitting a hyperbola to the results of two independent experiments plotted together in 30 mM MOPS pH 7.8, 1 mM TCEP, 100 mM NaCl, and 1 mM CaCl2.  ***b***: Value and error reported are from fitting a hyperbola to the results of two independent experiments plotted together in 30 mM MOPS pH 7.8, 1 mM TCEP, 330 mM NaCl, 20 mM CaCl2.  ***c***: We could not reach saturating enzyme conditions for Y140A binding to pre-tRNACys in 330 mM NaCl and 20 mM CaCl2. A lower limit for *K*D was estimated from the available data, assuming the saturating anisotropy was the same as for WT. | | | | | | | |

**Supplemental Figures**


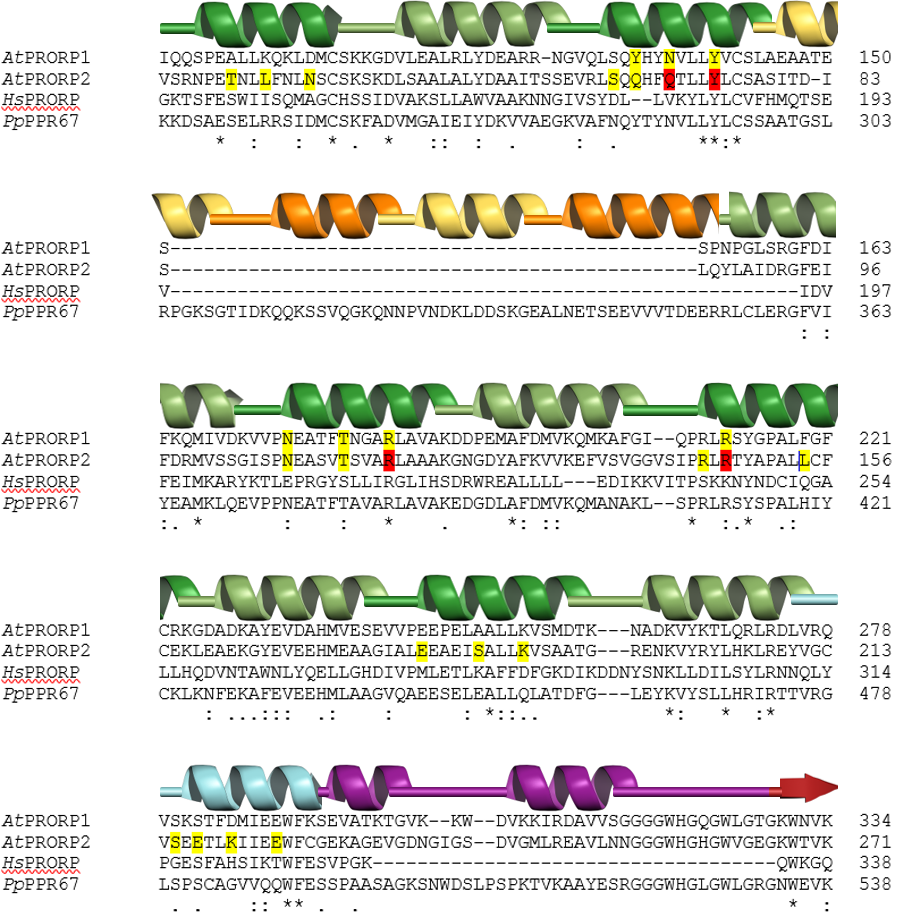


**Figure S1.** Alignment of PRORP PPR domains (Clustal Omega) (Goujon *et al.* 2010; Sievers *et al.* 2011). The three *Arabidopsis thaliana* PRORPs (*At*PRORP1-3) were aligned to the human PRORP (*Hs*PRORP) and PRORPs from the moss *Physcomitrella patens* (*Pp*PPR63, *Pp*PPR67, and *Pp*PPR104). For clarity, *At*PRORP3, *Pp*PPR67, and *Pp*PPR104 are excluded from the figure. The boundaries of additional PPR helices in *P*. *patens* PRORPs were assigned using models generated with *At*PRORP1 (PDB 4g23) and chloroplast PPR protein 10 (PDB 4m59) as templates in the SWISS-MODEL ExPASy server (Arnold *et al.* 2006; Guex *et al.* 2009; Kiefer *et al.* 2009; Biasini *et al.* 2014). PPR A helices, which were targeted for mutation, are colored *dark green*, while PPR B helices are colored *pale green*. Additional putative PPR A helices in *Pp*PPR67 are colored *orange*, while putative PPR B helices are colored *beige*. PPR helix 11 (numbered as in *At*PRORPs) is colored *cyan*, while a plant-specific helical insert is *purple* and the first β-strand of the central domain is *red*. *At*PRORP1 and *At*PRORP2 residues mutated in this manuscript are highlighted in yellow. *At*PRORP2 residues for which alanine mutants were insoluble are highlighted in red.


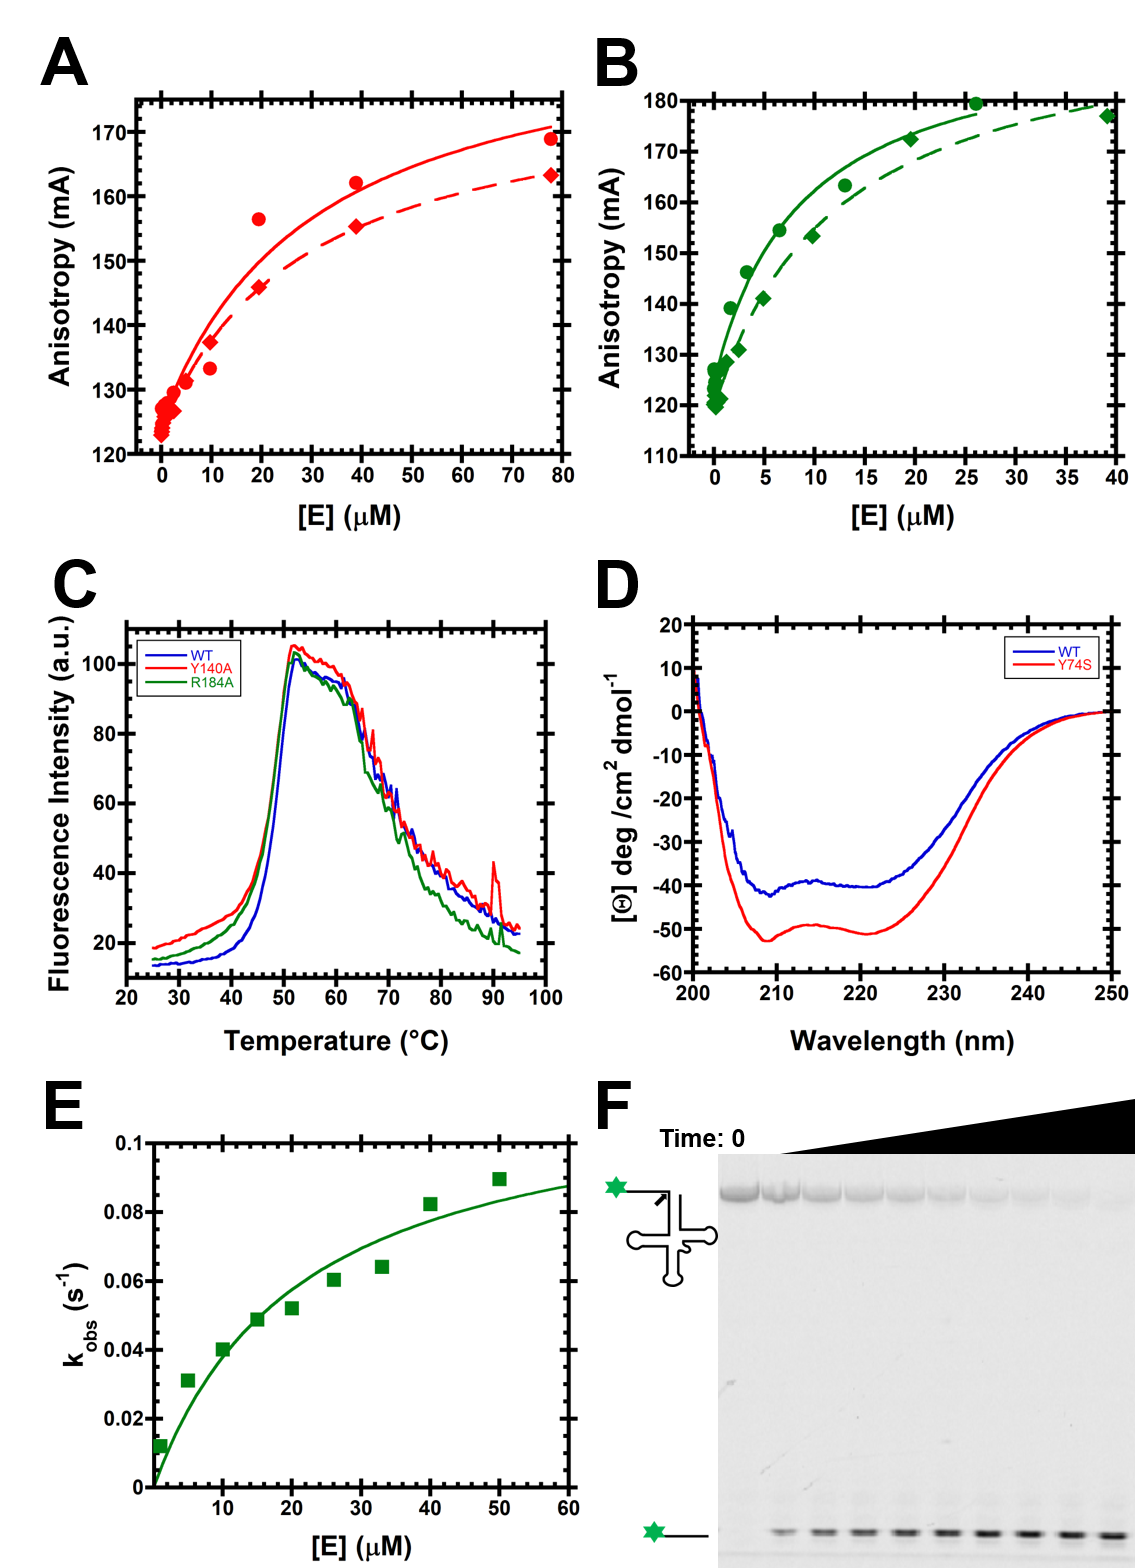


**Figure S2**. Stability of Y140A and R184A *At*PRORP1 or Y74S *At*PRORP2. (**A**) Binding curves for Y140A *At*PRORP1 collected at 330 mM NaCl, as described in the Materials and Methods. (**B**) Binding curves for R184A *At*PRORP1 collected at 330 mM NaCl, as described in the Materials and Methods. (**C**) Thermofluor melting curves for WT, Y140A, and R184A *At*PRORP1, collected and analyzed as described in the Supplemental Methods. The Tm values are 48.3 ± 0.1 (WT), 47.7 ± 0.2 (Y140A), and 47.4 ± 0.2 (R184A). (**D**) Circular dichroism data for WT and Y74S *At*PRORP2, collected and analyzed as described in the Supplemental Methods. (**E**) Single turnover kinetic analysis of R184A *At*PRORP1 with *B*. *subtilis* pre-tRNAAsp, collected at 25°C in 30 mM MOPS, pH 7.8, 150 mM NaCl, 20 mM MgCl2, and 1 mM TCEP. Fitting a hyperbola to the data, we obtain *k*maxE = 0.12 ± 0.01 s-1 and *K*1/2E = 21 ± 7 μM. The WT enzyme value under these conditions is ~ 0.1 s-1 (Howard *et al.* 2015). (**F**) A representative gel from the experiments described in panel E, at 40 μM enzyme. Time points (left to right) are 0, 6 sec, 16 sec, 26 sec, 40 sec, 1 min, 2.5 min, 5 min, 10 min, and 30 min.


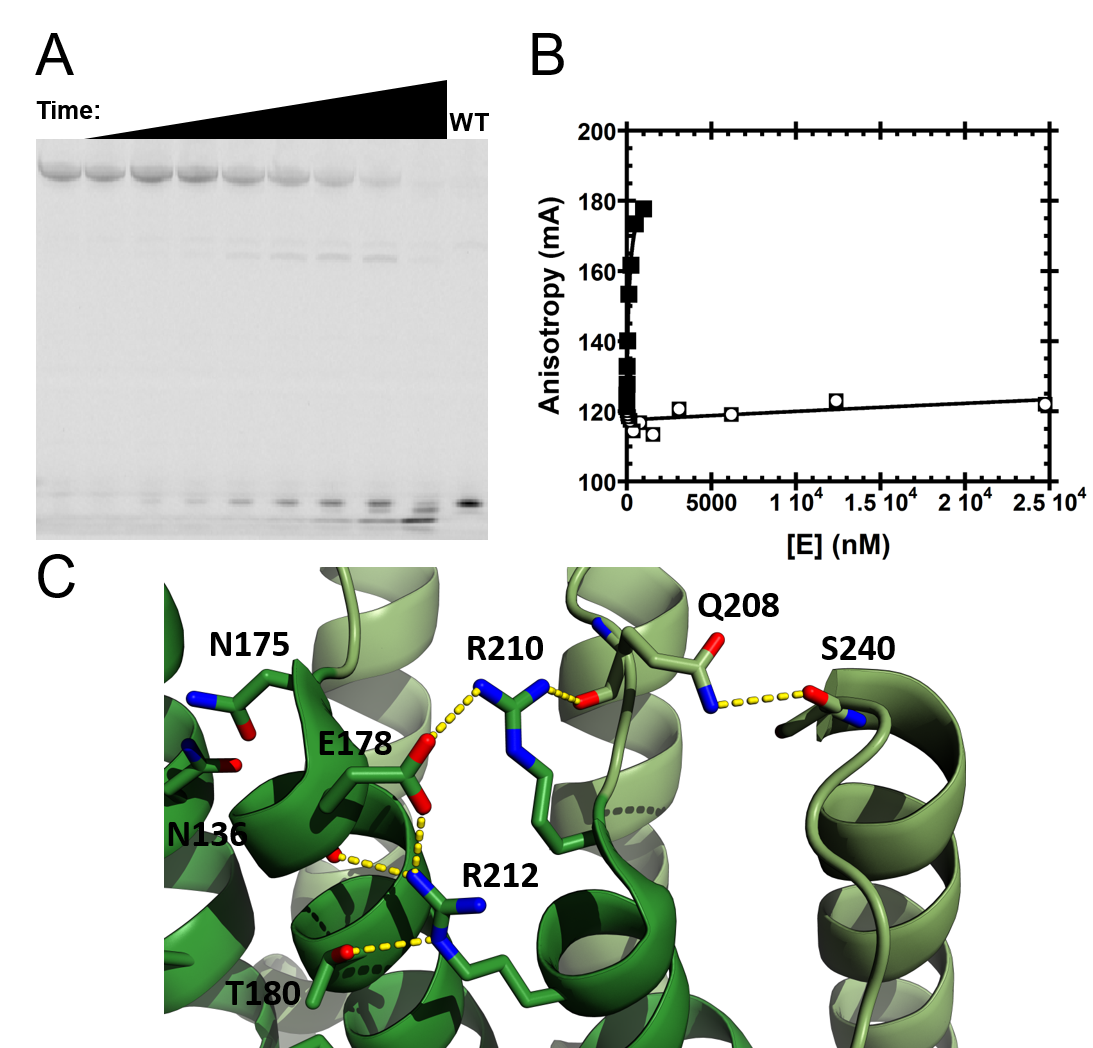


**Figure S3.** Defects in R212A *At*PRORP1 catalysis and substrate binding with *B*. *subtilis* pre-tRNAAsp. (**A**) Single turnover assay with 37 μM R212A and 30 nM substrate. Time points (left to right) are 0, 1 min, 5 min, 10 min, 30 min, 1 hr, 2 hr, 4 hr 20 min, and 20 hr 40 min. 5 μM WT enzyme at 30 minutes (at right) was included for comparison. (**B**) Anisotropy pre-tRNAAsp binding to R212A (◘) or WT (◼) *At*PRORP1. A hyperbola (Equation 1, Materials and Methods) was fit to the data (*K*D,app > 300000 nM; lower limit estimated assuming the change in anisotropy for fully-bound substrate is the same as WT). (**C**) Arg 212 in *At*PRORP1 takes part in an extended series of interactions involving both main chain and side chain atoms, beginning with Thr 180 (PPR 3 helix A) and terminating with Ser 240 (PPR 4 helix B). Generated in PyMOL (PDB 4g24) (Schrödinger 2010).

**Supplemental References**

Arnold K, Bordoli L, Kopp J, Schwede T. 2006. The SWISS-MODEL workspace: a web-based environment for protein structure homology modelling. *Bioinformatics* **22**: 195-201.

Biasini M, Bienert S, Waterhouse A, Arnold K, Studer G, Schmidt T, Kiefer F, Gallo Cassarino T, Bertoni M, Bordoli L et al. 2014. SWISS-MODEL: modelling protein tertiary and quaternary structure using evolutionary information. *Nucleic Acids Res* **42**: W252-258.

deHaseth PL, Lohman TM, Record MT, Jr. 1977. Nonspecific interaction of lac repressor with DNA: an association reaction driven by counterion release. *Biochemistry* **16**: 4783-4790.

Ericsson UB, Hallberg BM, Detitta GT, Dekker N, Nordlund P. 2006. Thermofluor-based high-throughput stability optimization of proteins for structural studies. *Anal Biochem* **357**: 289-298.

Goujon M, McWilliam H, Li W, Valentin F, Squizzato S, Paern J, Lopez R. 2010. A new bioinformatics analysis tools framework at EMBL-EBI. *Nucleic Acids Res* **38**: W695-699.

Guex N, Peitsch MC, Schwede T. 2009. Automated comparative protein structure modeling with SWISS-MODEL and Swiss-PdbViewer: a historical perspective. *Electrophoresis* **30 Suppl 1**: S162-173.

Howard MJ, Klemm BP, Fierke CA. 2015. Mechanistic Studies Reveal Similar Catalytic Strategies for Phosphodiester Bond Hydrolysis by Protein-only and RNA-dependent Ribonuclease P. *J Biol Chem* **290**: 13454-13464.

Jayasimha P, Shanmuganathan A, Suladze S, Makhatadze GI. 2012. Contribution of buried aspartic acid to the stability of the PDZ2 protein. *The Journal of Chemical Thermodynamics* **52**: 64-68.

Kiefer F, Arnold K, Kunzli M, Bordoli L, Schwede T. 2009. The SWISS-MODEL Repository and associated resources. *Nucleic Acids Res* **37**: D387-392.

Leroy JL, Gueron M, Thomas G, Favre A. 1977. Role of divalent ions in folding of tRNA. *Eur J Biochem* **74**: 567-574.

Liu X, Chen Y, Fierke CA. 2014. A real-time fluorescence polarization activity assay to screen for inhibitors of bacterial ribonuclease P. *Nucleic Acids Res* **42**: e159.

Schrödinger, LLC. 2010. PyMOL Molecular Graphics System, Version 1.5.

Sievers F, Wilm A, Dineen D, Gibson TJ, Karplus K, Li W, Lopez R, McWilliam H, Remmert M, Soding J et al. 2011. Fast, scalable generation of high-quality protein multiple sequence alignments using Clustal Omega. *Mol Syst Biol* **7**: 539.
